# Supplementary material for: Genome-Wide Association Mapping of Root Traits in a Japonica Rice Panel
Source: PubMed Central journal article supplement (PMC3818351; doi:10.1371/journal.pone.0078037), 2013-11-05

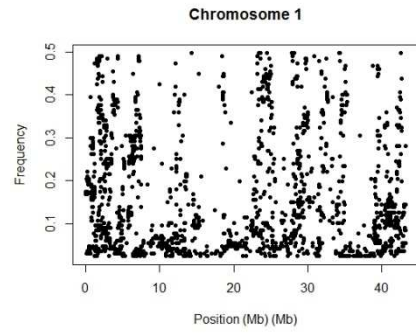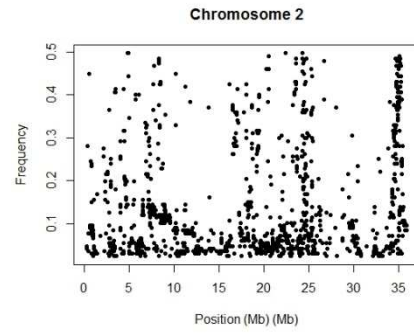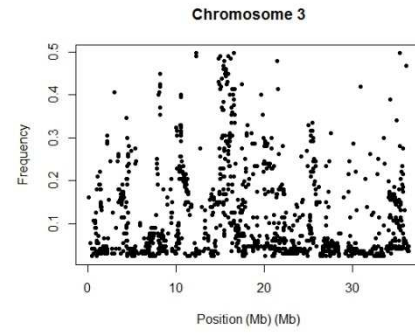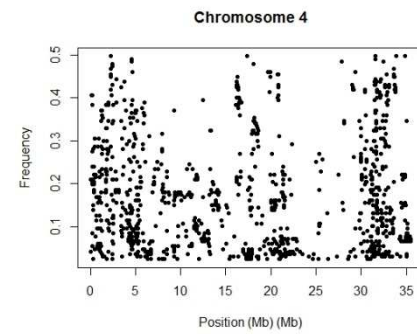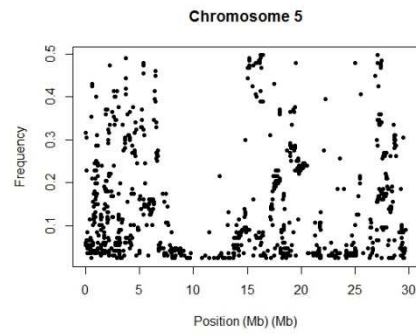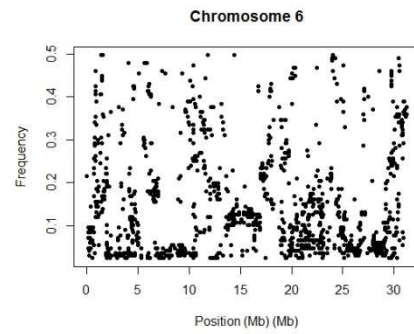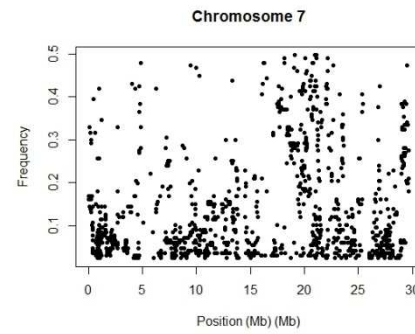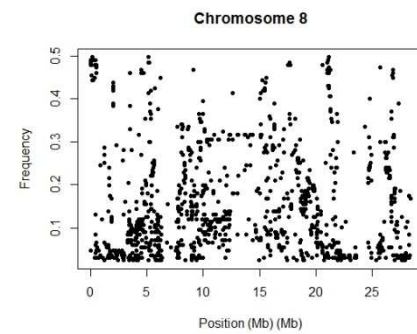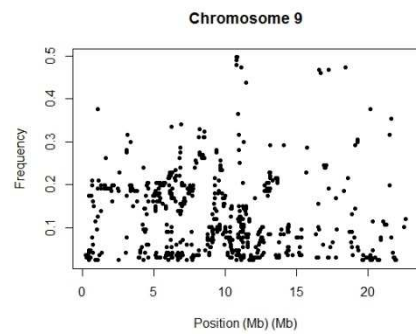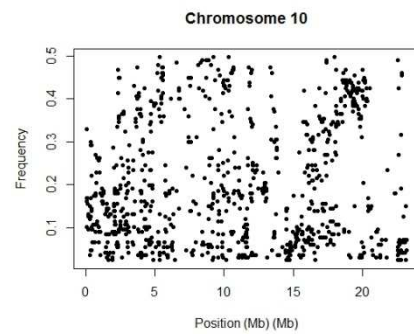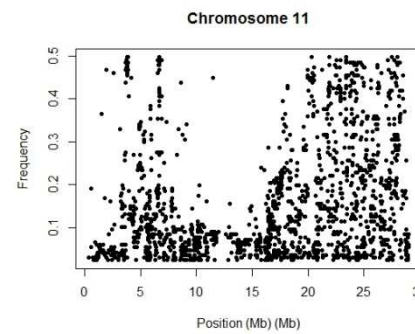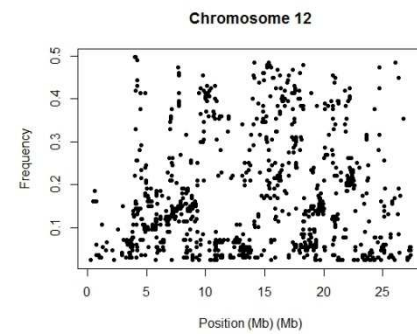

Supplement: pone.0078037.s001.pdf [file pone.0078037.s001.pdf]
