# Supplementary material for: Genome-Wide Association Mapping of Root Traits in a Japonica Rice Panel
Source: PLoS One. 2013 Nov 5;8(11):e78037. doi: 10.1371/journal.pone.0078037 (PMC3818351; doi:10.1371/journal.pone.0078037)
Supplement: Table S2 — Composition of the nutrient solution. (XLSX) [file pone.0078037.s004.xlsx]

## Sheet: SupTable2
Table S2: Composition of the nutrient solution
Salt	Concentration
MgSO4.7H2O	1.60 mM
Ca(NO3)2.4H2O	1.20 mM
KNO3	0.70 mM
(NH4)2SO4	0.50 mM
KH2PO4	0.40 mM
FeSO4	0.10 mM
Na2EDTA	0.10 mM
H3BO3	22.60 µM
MnSO4.H2O	10.00 µM
CuSO4.5H2O	0.80 µM
ZnSO4.7H2O	0.70 µM
(NH4)6Mo7O24.4H2O	0.16 µM
pH=5.4
