# Supplementary material for: Genome-Wide Association Mapping of Root Traits in a Japonica Rice Panel
Source: PLoS One. 2013 Nov 5;8(11):e78037. doi: 10.1371/journal.pone.0078037 (PMC3818351; doi:10.1371/journal.pone.0078037)
Supplement: Table S3 — Average linkage disequilibrium between marker pairs according to chromosomes and distance between markers. (XLSX) [file pone.0078037.s005.xlsx]

## Sheet: SupTable3
Table S3: Average linkage disequilibrium between marker pairs according to chromosomes and distance between markers
	Distance between markers (Kb)
Chr	1-20	20-40	40-60	60-80	80-100	100-150	150-200	200-250	250-300	300-350	350-400	400-450	450-500	500-550	550-600	600-650	650-700	700-750	750-800	800-850	850-900	900-950	950-1000	1000-1500	1500-2000	2000-2500	2500-3000	>3000
1	0.672989	0.580735	0.524728	0.483888	0.436295	0.378633	0.326892	0.294636	0.26341	0.232102	0.218473	0.199424	0.198758	0.166383	0.155805	0.136708	0.122055	0.116593	0.103478	0.119058	0.135607	0.109644	0.116989	0.0791052	0.0857592	0.0572748	0.0420689	0.0406795
2	0.657022	0.545322	0.543716	0.512172	0.519418	0.433494	0.339891	0.304653	0.26795	0.242733	0.213234	0.20849	0.188805	0.225354	0.221012	0.160334	0.146981	0.103545	0.0944634	0.120734	0.116993	0.14092	0.0870572	0.0904407	0.0675381	0.0373662	0.0529046	0.0290154
3	0.619714	0.633006	0.516958	0.522992	0.482322	0.4477	0.403981	0.442568	0.37369	0.343744	0.314073	0.290718	0.30641	0.290461	0.27355	0.249971	0.272448	0.251782	0.257538	0.223618	0.244548	0.190537	0.178207	0.132031	0.130613	0.120398	0.0885693	0.0422918
4	0.606256	0.489937	0.425603	0.400268	0.349082	0.300142	0.248625	0.244814	0.210601	0.191771	0.185224	0.16572	0.176889	0.149141	0.132254	0.142725	0.133732	0.142696	0.133188	0.132408	0.134415	0.125654	0.144261	0.159362	0.120668	0.124403	0.123749	0.13145
5	0.768526	0.668196	0.578482	0.618189	0.562011	0.510881	0.476416	0.434612	0.385076	0.352882	0.333401	0.290365	0.30292	0.247293	0.227354	0.231101	0.216417	0.183396	0.168967	0.164829	0.112512	0.0767022	0.076376	0.0810541	0.0433112	0.0504113	0.0682955	0.084162
6	0.655904	0.530035	0.494564	0.486267	0.506327	0.424545	0.363267	0.347408	0.335217	0.291162	0.295935	0.270541	0.261196	0.238755	0.235034	0.226252	0.204359	0.201338	0.194958	0.174014	0.14972	0.173175	0.158018	0.160416	0.176517	0.0865796	0.0530181	0.103112
7	0.670123	0.536189	0.497046	0.435098	0.45326	0.394192	0.360102	0.308169	0.286558	0.242822	0.243525	0.22016	0.204412	0.175541	0.150897	0.149658	0.143951	0.133396	0.128678	0.117112	0.102366	0.11186	0.0936048	0.129066	0.139653	0.0911534	0.0634942	0.0352217
8	0.706064	0.559142	0.548889	0.51928	0.512061	0.449025	0.375866	0.320252	0.28054	0.254572	0.236813	0.226395	0.198394	0.183888	0.161318	0.146076	0.132613	0.129052	0.132734	0.124753	0.117115	0.116715	0.113559	0.128051	0.12785	0.0865063	0.122309	0.0644386
9	0.748677	0.665465	0.616013	0.534385	0.566104	0.527047	0.442777	0.377697	0.320661	0.313347	0.33311	0.329699	0.28299	0.34313	0.248179	0.262334	0.232574	0.273598	0.242821	0.193894	0.230043	0.235068	0.170811	0.14381	0.123892	0.1	0.09	0.0972545
10	0.628041	0.576306	0.498586	0.488638	0.441278	0.390989	0.351796	0.346462	0.311538	0.300869	0.280396	0.274606	0.267391	0.262833	0.239285	0.224406	0.20255	0.186524	0.158852	0.15122	0.146955	0.105209	0.0943427	0.103403	0.171482	0.136417	0.0930567	0.0862476
11	0.544995	0.4327	0.362868	0.316736	0.284266	0.254391	0.236786	0.190562	0.156202	0.13968	0.123276	0.122915	0.113461	0.107523	0.0858114	0.099584	0.0858281	0.0766854	0.082977	0.0969433	0.0866061	0.0891742	0.0810386	0.0923577	0.0612705	0.0541721	0.044361	0.0540551
12	0.683141	0.599155	0.543518	0.523895	0.472659	0.487903	0.45304	0.391826	0.374632	0.359107	0.341033	0.327435	0.321711	0.295041	0.306753	0.28593	0.280614	0.245619	0.267245	0.259678	0.256986	0.212354	0.205521	0.134384	0.0973758	0.0885917	0.0951974	0.0643538
Average	0.663454	0.568016	0.512581	0.486817	0.465424	0.416579	0.364953	0.333638	0.297173	0.272066	0.259875	0.243872	0.235278	0.223779	0.203104	0.192923	0.181177	0.170352	0.163825	0.156522	0.152822	0.140584	0.126649	0.119457	0.112161	0.0852728	0.0755853	0.0693569
Stdev	0.0612086	0.0690271	0.0668742	0.0756828	0.0822965	0.0803471	0.0739271	0.0734178	0.0684489	0.0672416	0.0680478	0.0640984	0.0640599	0.0690013	0.0649902	0.0601535	0.0624118	0.0634682	0.0638666	0.0489161	0.0580126	0.0506198	0.0433789	0.0291507	0.0420498	0.0314781	0.028309	0.0314913
CV	9.22574	12.1523	13.0466	15.5465	17.6821	19.2874	20.2566	22.0052	23.0334	24.7152	26.1849	26.2836	27.2273	30.8346	31.9985	31.1801	34.448	37.2571	38.9847	31.252	37.9608	36.0067	34.2514	24.4027	37.4906	36.9146	37.4531	45.4048
Kb = kilobase; Stdev = standard deviation; CV = coefficient of variation
